# Supplementary material for: The role of MAPT gene in Chinese dementia patients: a P301L pedigree study and brief literature review
Source: PubMed Central journal article supplement — Neuropsychiatr Dis Treat. 2018 Jun 18;14:1627–33. doi: 10.2147/NDT.S155521 (PMC6018486; doi:10.2147/ndt.s155521), 2018-06-18
Supplement: ndt-14-1627s1.pdf [file ndt-14-1627s1.pdf]

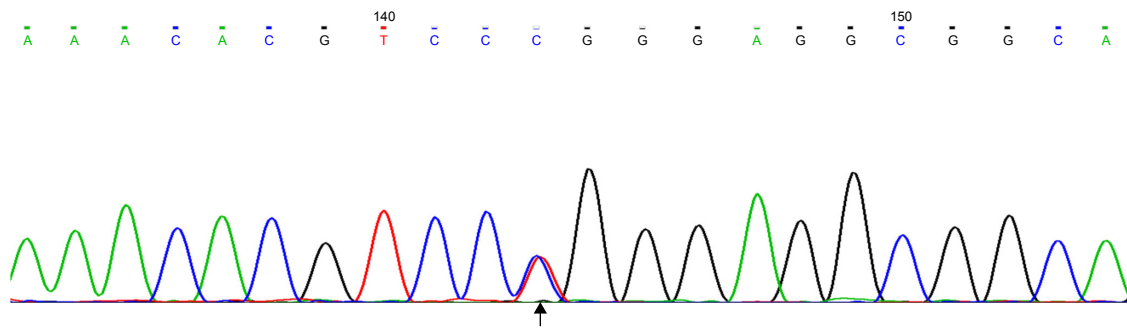

**Figure S1** Sequencing of exon 10 of the *MAPT* gene showing a homozygous c.1907C>T mutation (p.P301L).  
**Note:** The arrow indicates the 143 site on DNA sequencing chromatogram.
